# Supplementary material
Source: PubMed Central journal article supplement (PMC4095745)
Supplement: NIHMS597731-supplement-01.pdf [file NIHMS597731-supplement-01.pdf]

**Supplementary Table 1. Pearson's correlation coefficients on the relationship of allele-specific apo(a) (mg/dL) with plasma lipid and lipoprotein levels **with and without adjustment for the covariates of age, sex, and BMI****

|                           | Caucasians |        |          |        | African-Americans |        |          |        |
|---------------------------|------------|--------|----------|--------|-------------------|--------|----------|--------|
|                           | Unadjusted |        | Adjusted |        | Unadjusted        |        | Adjusted |        |
|                           | r          | p      | r        | p      | r                 | p      | r        | p      |
| <b>Before correction</b>  |            |        |          |        |                   |        |          |        |
| Total cholesterol (mg/dL) | 0.144      | 0.001  | 0.166    | <0.001 | 0.260             | <0.001 | 0.260    | <0.001 |
| LDL cholesterol (mg/dL)   | 0.189      | <0.001 | 0.192    | <0.001 | 0.275             | <0.001 | 0.279    | <0.001 |
| ApoB-100 (mg/dL)          | 0.113      | 0.013  | 0.132    | 0.005  | 0.284             | <0.001 | 0.289    | <0.001 |
| ApoB/ApoA-1               | 0.115      | 0.012  | 0.128    | 0.006  | 0.245             | <0.001 | 0.255    | <0.001 |
| HDL cholesterol (mg/dL)   | -0.038     | NS     | -0.045   | NS     | -0.023            | NS     | -0.035   | NS     |
| Triglycerides (mg/dL)     | -0.001     | NS     | 0.024    | NS     | 0.098             | NS     | 0.101    | 0.045  |
| ApoA-1 (mg/dL)            | -0.020     | NS     | -0.025   | NS     | -0.022            | NS     | -0.031   | NS     |
| <b>After correction</b>   |            |        |          |        |                   |        |          |        |
| Total cholesterol (mg/dL) | -0.057     | NS     | -0.059   | NS     | 0.087             | NS     | 0.073    | NS     |
| LDL cholesterol (mg/dL)   | -0.052     | NS     | -0.066   | NS     | 0.089             | NS     | 0.078    | NS     |

|                  |        |    |       |    |       |        |       |        |
|------------------|--------|----|-------|----|-------|--------|-------|--------|
| ApoB-100 (mg/dL) | -0.010 | NS | 0.001 | NS | 0.187 | <0.001 | 0.184 | <0.001 |
| ApoB/ApoA-1      | 0.003  | NS | 0.015 | NS | 0.160 | 0.001  | 0.164 | 0.001  |

---

Logarithmically transformed triglyceride and square root transformed allele-specific apo(a) values were used for statistical analyses.

For abbreviations and calculations of corrected levels, see the Table 1 and Table 2 footnotes, respectively.
